# Supplementary material for: Intellectual Disability in Episodic Ataxia Type 2: Beyond Paroxysmal Vertigo and Ataxia
Source: PubMed Central journal article supplement — J Clin Neurol. 2024 Oct 17;20(6):563–70. doi: 10.3988/jcn.2024.0274 (PMC11543395; doi:10.3988/jcn.2024.0274), 2024-10-17
Supplement: jcn-20-563-s001.pdf [file jcn-20-563-s001.pdf]

**Supplementary Table 1.** Intellectual function of the patients on Wechsler Adult Intelligence Scale

|    | Levels                  | FSIQ      | VCI      | PRI       | WMI       | PSI       |
|----|-------------------------|-----------|----------|-----------|-----------|-----------|
| 1  | Average                 | 101       | 90       | 103       | 109       | 110       |
| 2  | Average                 | 99        | 100      | 94        | 125       | 81        |
| 3  | Low average             | 86        | 90       | 103       | 93        | 75        |
| 4  | Low average             | 83        | 76       | 96        | 81        | 98        |
| 5  | Low average             | 80        | 77       | 88        | 98        | 81        |
| 6* | Low average             | 80        | 86       | 84        | 83        | 92        |
| 7  | Low average             | 80        | 83       | 92        | 90        | 78        |
| 8  | Borderline              | 77        | 88       | 74        | 75        | 97        |
| 9  | Intellectual disability | 67        | 74       | 68        | 78        | 84        |
| 10 | Intellectual disability | 66        | 70       | 76        | 69        | 84        |
| 11 | Intellectual disability | 65        | 76       | 70        | 87        | 66        |
| 12 | Intellectual disability | 64        | 68       | 76        | 78        | 66        |
| 13 | Intellectual disability | 63        | 72       | 72        | 63        | 78        |
|    | Mean±SD                 | 77.8±12.2 | 80.8±9.1 | 84.3±12.0 | 86.8±16.1 | 83.8±12.2 |

\*The Wechsler Intelligence Scale for Children is used for the intelligence test (Patient 6).

FSIQ, full-scale intelligence quotient; PRI, perceptual reasoning index; PSI, processing speed index; SD, standard deviation; VCI, verbal comprehension index; WMI, working memory index.
